# Supplementary material for: Change in global transmission rates of COVID-19 through May 6 2020
Source: PubMed Central journal article supplement (PMC7410207; doi:10.1371/journal.pone.0236776), 2020-08-06
Supplement: pone.0236776.s001.pdf [file pone.0236776.s001.pdf]

## Supplemental

### Estimating the infection and counting rates with exponential growth

Consider an exponential growth model early in the outbreak where infected ( $I$ ) persons transmit at rate  $\beta$ , are counted ( $C$ ) at rate  $\alpha(t)$ , recover ( $R$ ) at rate  $\gamma_1$ , and die ( $D$ ) at rate  $\gamma_2$ . When individuals are counted, they are not removed from  $I$  and transmit at the same rate as uncounted persons. The differential equations for  $I$  and  $C$  cases in time  $t$ , where  $(I, C, R, D)$  are dimensionless numbers, but  $(\alpha, \beta, \gamma_1, \gamma_2)$  have units of  $(\text{time})^{-1}$ , state,

$$\frac{dI(t)}{dt} = \beta I(t) - \gamma_1 I(t) - \gamma_2 I(t), \quad (1)$$

$$\frac{dC(t)}{dt} = \alpha(t) I(t), \quad (2)$$

$$\frac{dR(t)}{dt} = \gamma_1 I(t), \quad (3)$$

$$\frac{dD(t)}{dt} = \gamma_2 I(t). \quad (4)$$

Let us also tie  $C$  to  $R$ . We have that,

$$\frac{C(t)}{dt} = \alpha(t) I(t), \quad (5)$$

$$= \frac{\alpha(t)}{\gamma_2} \frac{dD(t)}{dt}. \quad (6)$$

The problem is that we only observe  $dC(t)/dt$  and  $dD(t)/dt$ . So algebraically,

$$\alpha(t) = \gamma_2 \frac{dC(t)/dt}{dD(t)/dt}. \quad (7)$$

Given the model specified, it is true that  $\alpha = \gamma_2 (dC/dt)/(dD/dt)$ . Since they are total derivatives, it is also true that  $\alpha = \gamma_2 dC/dD$ .

### Constant counting rate

It is a first-order problem to show that,

$$I = I_0 \exp[(\beta - \gamma_1 - \gamma_2)t], \quad (8)$$

$$S = -\beta(\beta - \gamma_1 - \gamma_2)^{-1} I, \quad (9)$$

$$R = \gamma_1(\beta - \gamma_1 - \gamma_2)^{-1} I, \quad (10)$$

$$D = \gamma_2(\beta - \gamma_1 - \gamma_2)^{-1} I, \quad (11)$$

as well as, when  $d\alpha/dt = 0$ ,

$$C = \alpha(\beta - \gamma_1 - \gamma_2)^{-1} I. \quad (12)$$

An interpretation is that  $I(t) = C(t + \tau)$ , with time lag of  $\tau$  applied to  $t$ , where,

$$\tau = \frac{1}{\beta - \gamma_1 - \gamma_2} \log \left( \frac{\alpha}{\beta - \gamma_1 - \gamma_2} \right). \quad (13)$$

This simply shows that if the counting rate is constant, then the value of  $C$  is simply equal to  $I$  shifted in time by  $\tau$ .

### Time-varying counting rate

For time-varying  $\alpha$ , at time  $t$  with initial count  $C_0$  at time  $t_0$ , in terms of (the only quantities observable)  $C$  &  $D$ ,

$$C = C_0 + (\gamma_2)^{-1} \int_{t_0}^t \alpha dD, \quad (14)$$

$$= C_0 + (\gamma_2)^{-1} \left[ \alpha(t)D(t) - \alpha(t_0)D(t_0) - \int_{t_0}^t D(t')(d\alpha/dt')dt' \right]. \quad (15)$$

Stipulating that  $C_0 = (\gamma_2)\alpha(t_0)D(t_0)$ , up to an additive constant,

$$C = (\gamma_2)^{-1} \left[ \alpha(t)D(t) - \int_{t_0}^t D(t')(d\alpha/dt')dt' \right], \quad (16)$$

which reduces back, if  $d\alpha/dt = 0$ , to the time-integral of Equation 7:

$$C = (\gamma_2)^{-1} \alpha D(t). \quad (17)$$

### Exponential-growth difference between counts and infections

In the case where  $d\alpha/dt > 0$ , we find the difference  $(d \log C)/dt - (d \log I)/dt$ . It is generally true that,

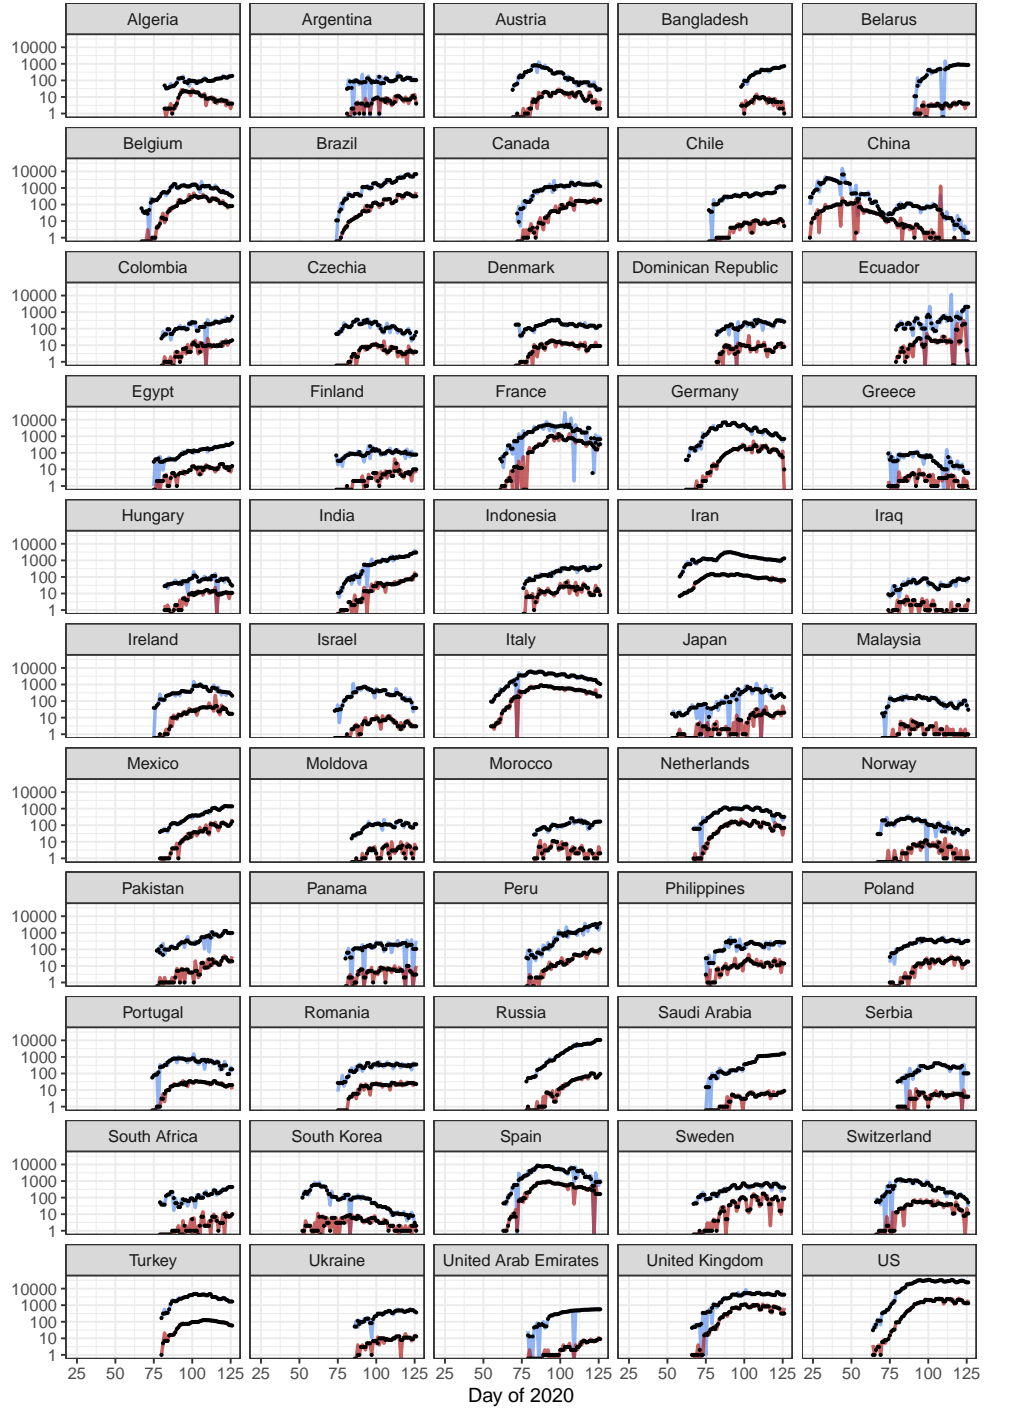

**S1 Fig.** Raw and smoothed data. Raw data for cases (blue lines) and deaths (red lines) are shown with the smoothed time series (black) used for model fitting. The x-axis is measured in sequential days of 2020.

$$\frac{dI}{dt} = \alpha^{-1}(\beta - \gamma_1 - \gamma_2) \frac{dC}{dt}. \quad (18)$$

Using  $dx = x d \log x$  to transform  $C, I$ ,

$$\frac{d \log I}{dt} = \frac{C}{I} \alpha^{-1} (\beta - \gamma_1 - \gamma_2) \frac{d \log C}{dt}. \quad (19)$$

Yet integration by parts shows that, for general  $d\alpha/dt$ ,

$$C = (\beta - \gamma_1 - \gamma_2)^{-1} \left[ \alpha(t)I(t) - \int_{t_0}^t I(t')(d\alpha/dt')dt' \right], \quad (20)$$

substitution of which yields,

$$\frac{d \log I}{dt} = \left( 1 - \frac{1}{\alpha(t)I(t)} \int_{t_0}^t I(t')(d\alpha/dt')dt' \right) \frac{d \log C}{dt}, \quad (21)$$

Whenever  $d\alpha/dt$  is positive and, as almost always the case,  $\alpha, I, dI/dt > 0$ , then Equation 21 implies that  $\log C$  grows faster than  $\log I$ . In the approximation that  $\alpha$  changes slowly,

$$\int I(d\alpha/dt')dt' \ll \alpha(t)I(t),$$

then Taylor expanding and rearranging terms yields a simpler expression,

$$\frac{d \log C}{dt} - \frac{d \log I}{dt} \approx \left( \frac{1}{\alpha(t)I(t)} \int_{t_0}^t I(t') \frac{d\alpha(t')}{dt'} dt' \right) \frac{d \log I}{dt}, \quad (22)$$

$$= \frac{1}{\alpha(t)e^{(\beta - \gamma_1 - \gamma_2)t}} \int_{t_0}^t e^{(\beta - \gamma_1 - \gamma_2)t'} \frac{d\alpha(t')}{dt'} dt'. \quad (23)$$

For all positive  $\alpha, d\alpha/dt$ , the right-hand side is positive. Evidently, the growth rate in logarithmic  $C$  exceeds that in logarithmic  $I$ . The growth rate of logarithmic  $C$  can be readily inferred from a log-linear plot, but  $I$  is generally unknown. When the testing rate increases during an epidemic's exponential growth phase, the number of counts  $C$  increases faster than the number of infections  $I$ .
